# Supplementary material for: Cu/CeO2 catalysts for reverse water gas shift reactions: the effect of the preparation method
Source: Royal Society of Chemistry journal article supplement (doi:10.1039/d4ra02545h), 2024-01-01
Supplement: d4ra02545h1.pdf [file d4ra02545h1.pdf]

## **Cu/CeO<sub>2</sub> catalysts for reverse water gas shift reactions: the effect of preparation method**

Jieru Wang<sup>1, 2, 3, 4</sup>; Chaoxian Wang<sup>1, 2, 3, 4</sup>; Yongqiang Feng<sup>1, 2, 3, 4</sup>; Fang Li<sup>1, 2, 3, 4</sup>;

Wanting Su<sup>1, 2, 3, 4</sup>; Yuanyuan Fang<sup>1, 2, 3, 4</sup>; Binran Zhao<sup>1, 2, 3, 4, \*</sup>

<sup>1</sup>School of Chemical Engineering, Northwest University, Xi'an 710069, China;

<sup>2</sup>International Scientific and Technological Cooperation Base of the Ministry of Science and Technology (MOST) for Clean Utilization of Hydrocarbon Resources, Xi'an 710069, China;

<sup>3</sup>Chemical Engineering Research Center of the Ministry of Education (MOE) for Advanced Use Technology of Shanbei Energy, Xi'an 710069, China;

<sup>4</sup>Shaanxi Research Center of Engineering Technology for Clean Coal Conversion, Xi'an 710069, China;

**Correspondence Authors:** zhaobr3636@126.com (B. R. Zhao);

**Table S1** BET parameters of Cu/CeO<sub>2</sub> and crystal surface ratio.

**Figure S1** XRD patterns of Cu/CeO<sub>2</sub>-mc, Cu/CeO<sub>2</sub>-mcc-1, Cu/CeO<sub>2</sub>-mcc-2 and CeO<sub>2</sub>-C support.

**Figure S2** Line scan of (a) Cu/CeO<sub>2</sub>-mc and (b) Cu/CeO<sub>2</sub>-mcc (green for Ce, purple for Cu, red for line scan position).

**Figure S3** CO<sub>2</sub> conversion and CO selectivity over Cu/CeO<sub>2</sub>-mc, Cu/CeO<sub>2</sub>-mcc and Cu/CeO<sub>2</sub>-c versus temperature.

**Figure S4** TEM images of Cu/CeO<sub>2</sub>-c (a) 50 nm and (b) 10 nm.

**Figure S5** (a) Micro-combustion process image and (b) infrared thermography image.

**Table S1** BET parameters of Cu/CeO<sub>2</sub> and crystal surface ratio.

| Catalysts                | S <sub>BET</sub> (m <sup>2</sup> /g) <sup>a</sup> | V <sub>p</sub> (cm <sup>3</sup> /g) <sup>a</sup> | D <sub>p</sub> (nm) <sup>a</sup> | I <sub>(111)</sub> /I <sub>(100)</sub> <sup>b</sup> |
|--------------------------|---------------------------------------------------|--------------------------------------------------|----------------------------------|-----------------------------------------------------|
| Cu/CeO <sub>2</sub> -mc  | 28.8                                              | 0.1                                              | 16.0                             | 2.6                                                 |
| Cu/CeO <sub>2</sub> -mcc | 28.8                                              | 0.1                                              | 16.1                             | 2.3                                                 |
| CeO <sub>2</sub>         | 29.0                                              | 0.1                                              | 18.5                             |                                                     |

a Determined by N<sub>2</sub> adsorption.

b Determined by XRD.

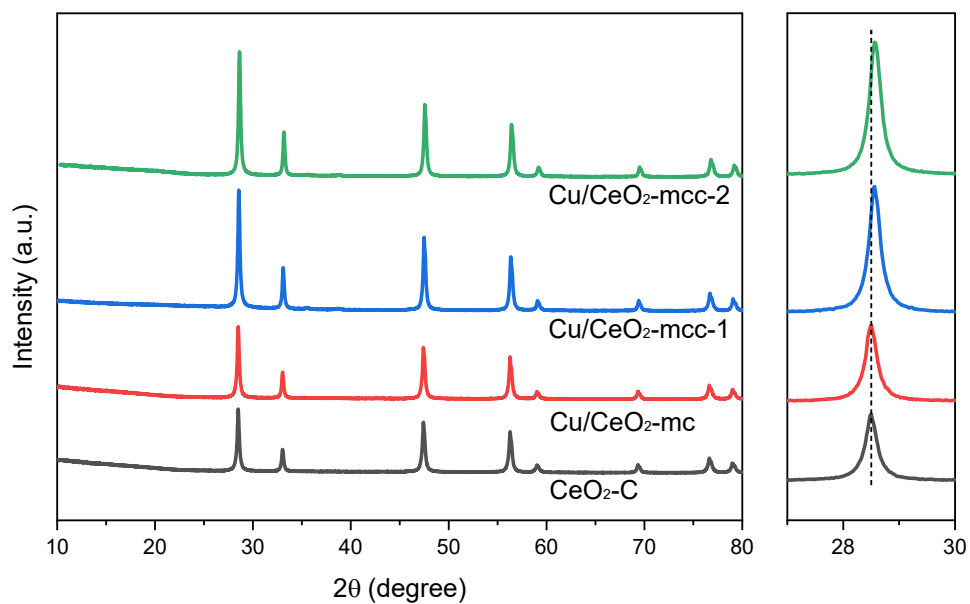

**Figure S1** XRD patterns of Cu/CeO<sub>2</sub>-mc, Cu/CeO<sub>2</sub>-mcc-1, Cu/CeO<sub>2</sub>-mcc-2 and CeO<sub>2</sub>-C support.

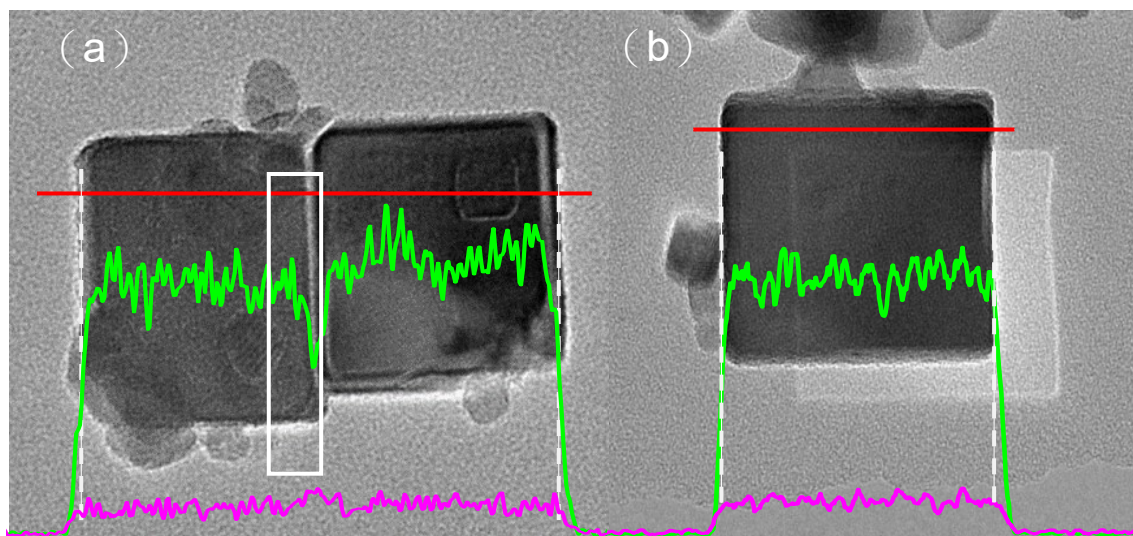

**Figure S2** Line scan of (a) Cu/CeO<sub>2</sub>-mc and (b) Cu/CeO<sub>2</sub>-mcc (green for Ce, purple for Cu, red for line scan position).

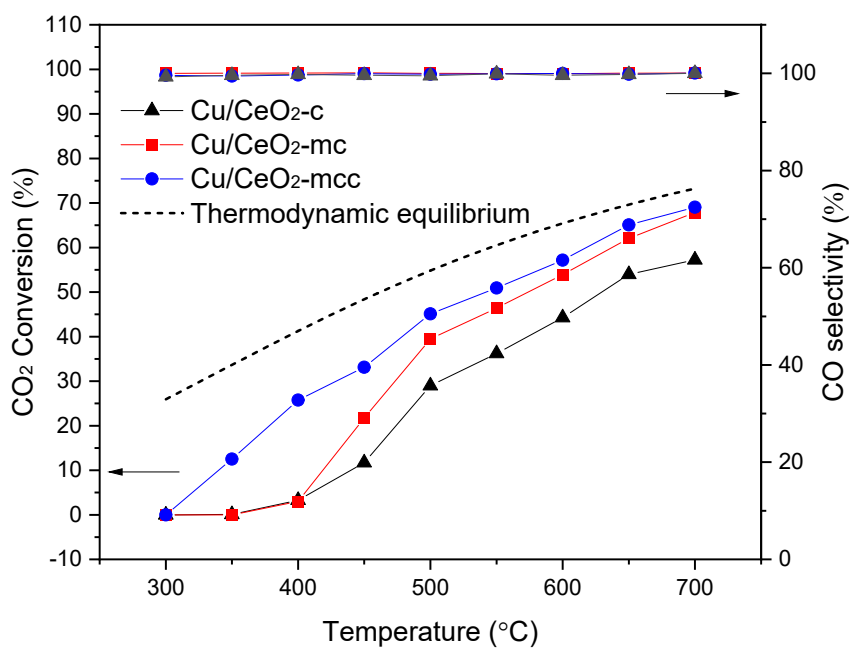

**Figure S3** CO<sub>2</sub> conversion and CO selectivity over Cu/CeO<sub>2</sub>-mc, Cu/CeO<sub>2</sub>-mcc and Cu/CeO<sub>2</sub>-c versus temperature.

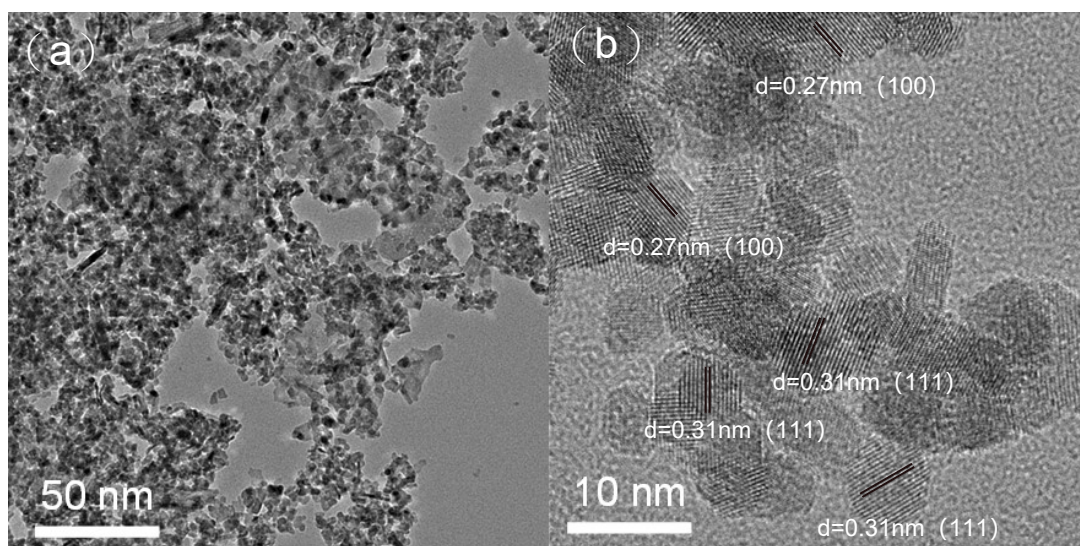

**Figure S4** TEM images of Cu/CeO<sub>2</sub>-c (a) 50 nm and (b) 10 nm.

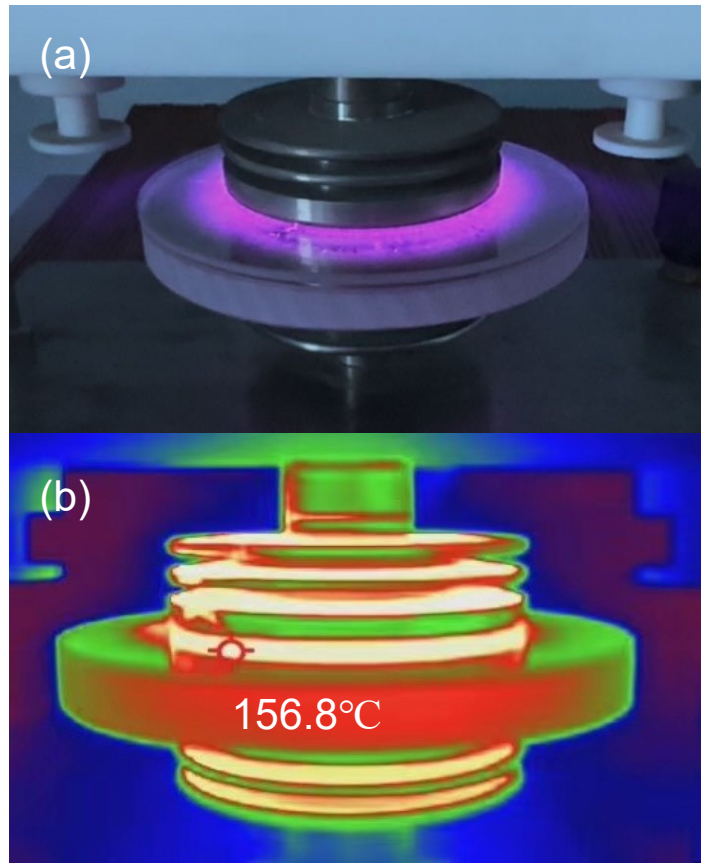

**Figure S5** (a) Micro-combustion process image and (b) infrared thermography image.
